# Supplementary material for: Modernization of Enoxaparin Molecular Weight Determination Using Homogeneous Standards
Source: MDPI journal article supplement (doi:10.3390/ph10030066), 2017-07-22
Supplement: s1 [file s1]

# Supplementary Material: Modernization of Enoxaparin Molecular Weight Determination Using Homogeneous Standards

Katelyn M. Arnold, Stephen J. Capuzzi, Yongmei Xu, Eugene N. Muratov, Kevin Carrick, Anita Y. Szajek, Alexander Tropsha and Jian Liu

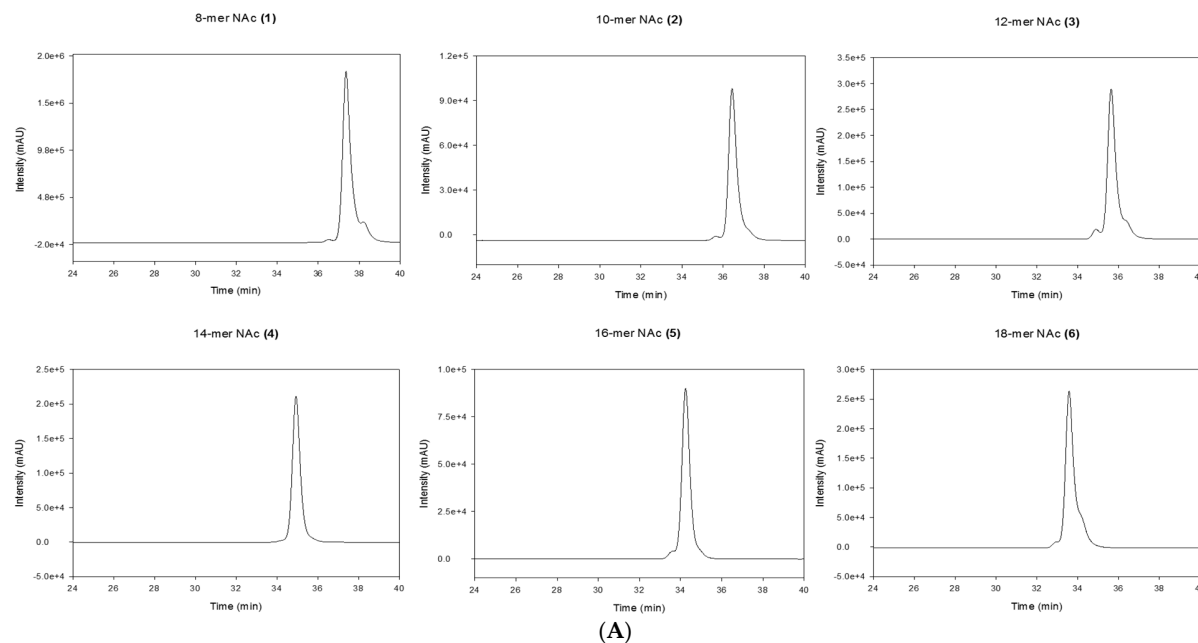

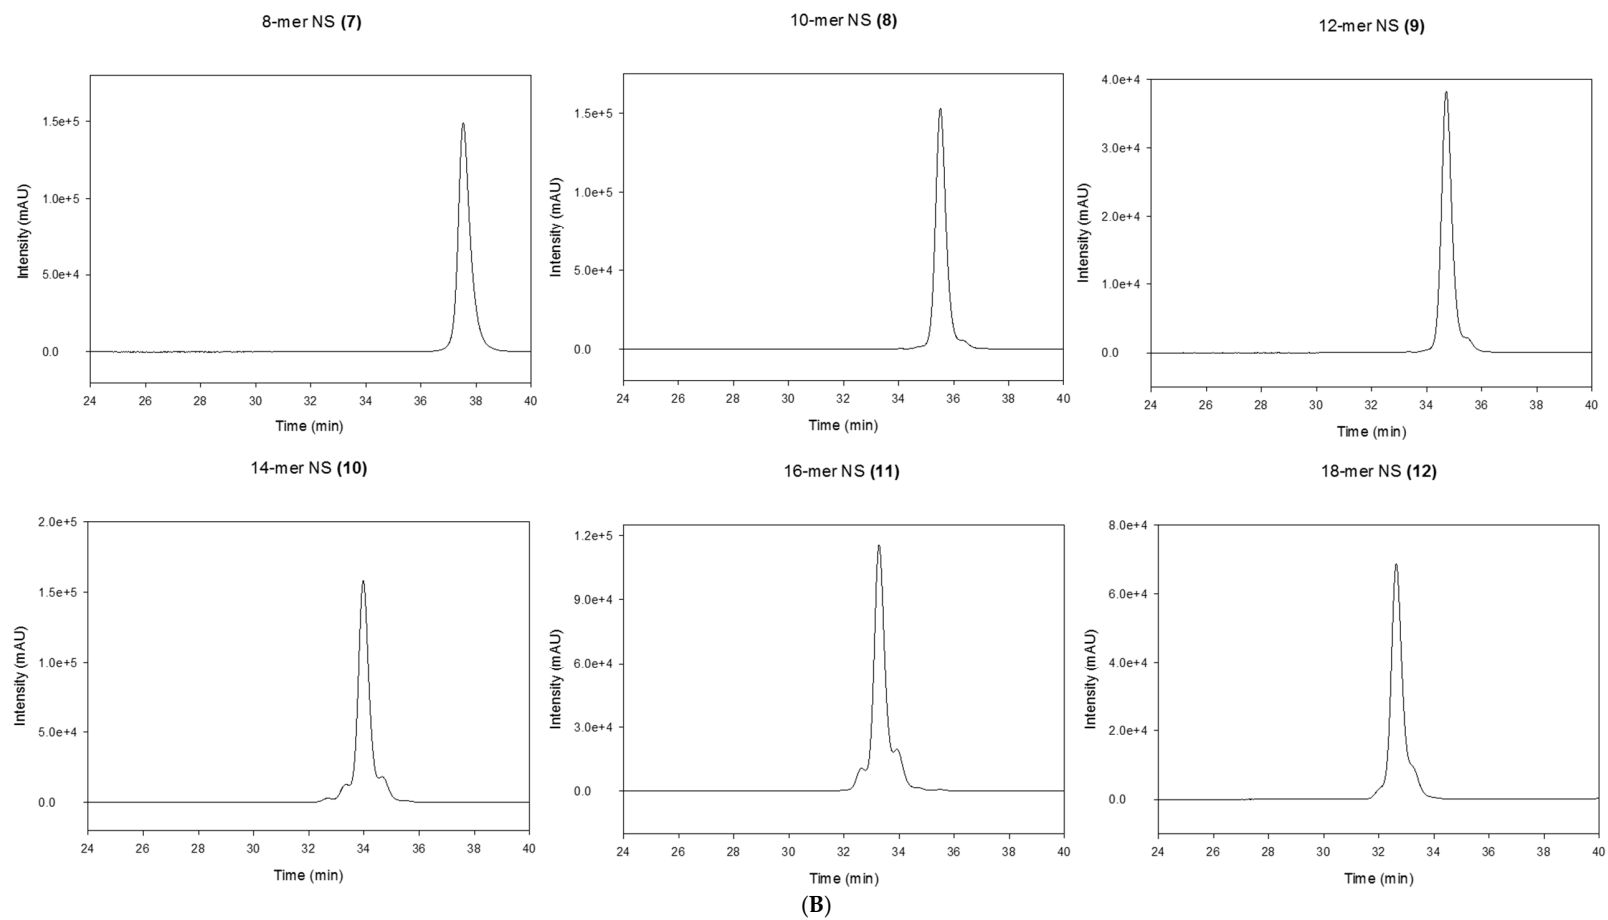

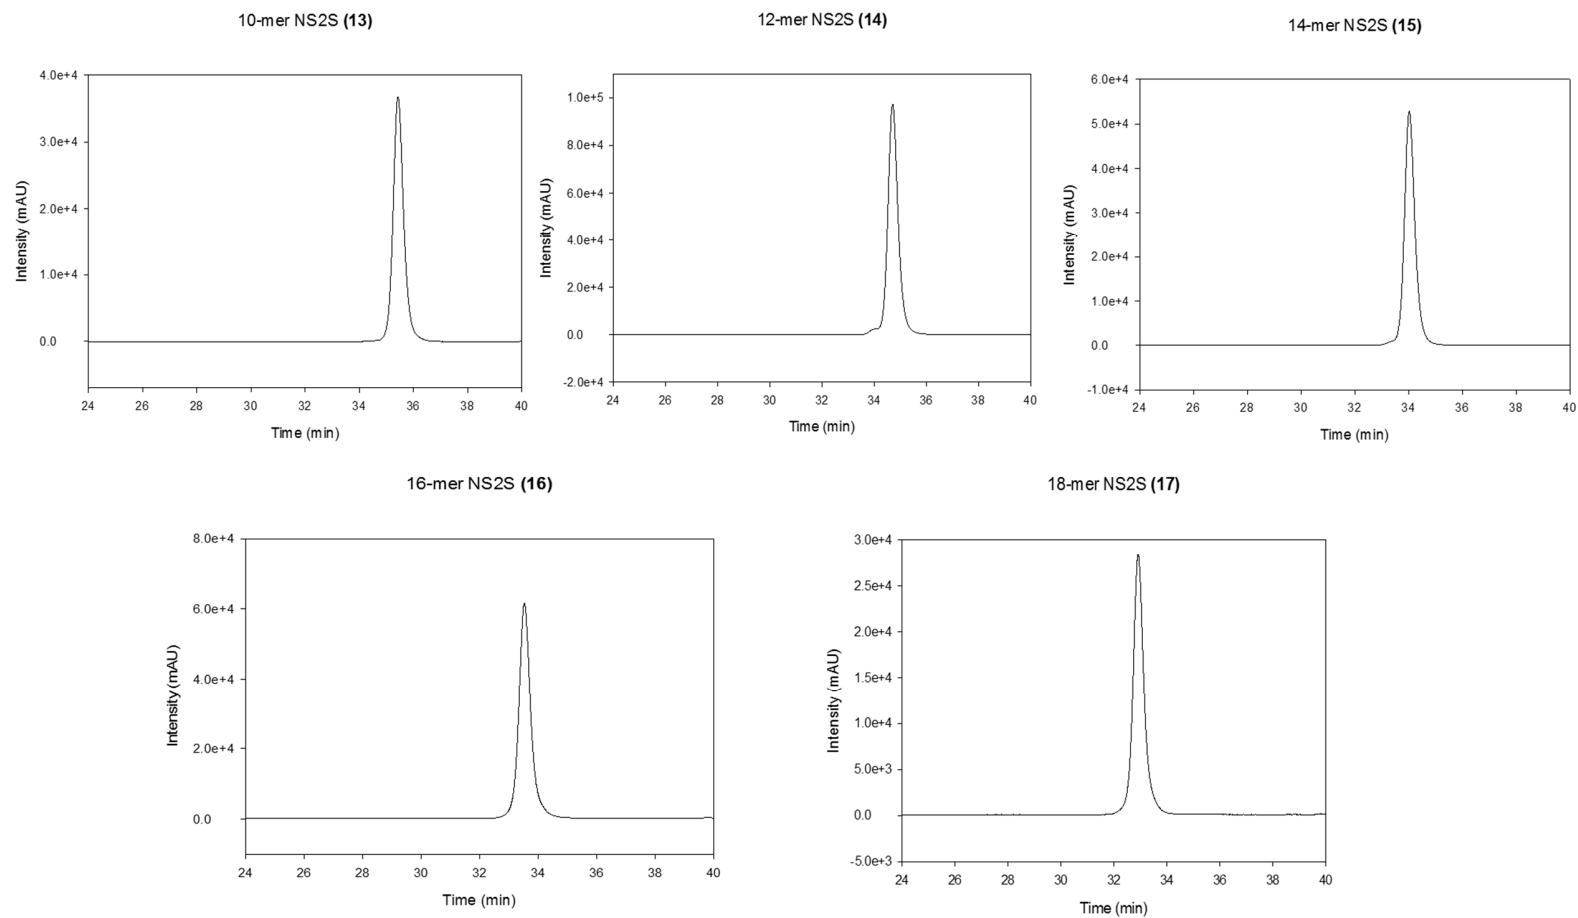

(C)

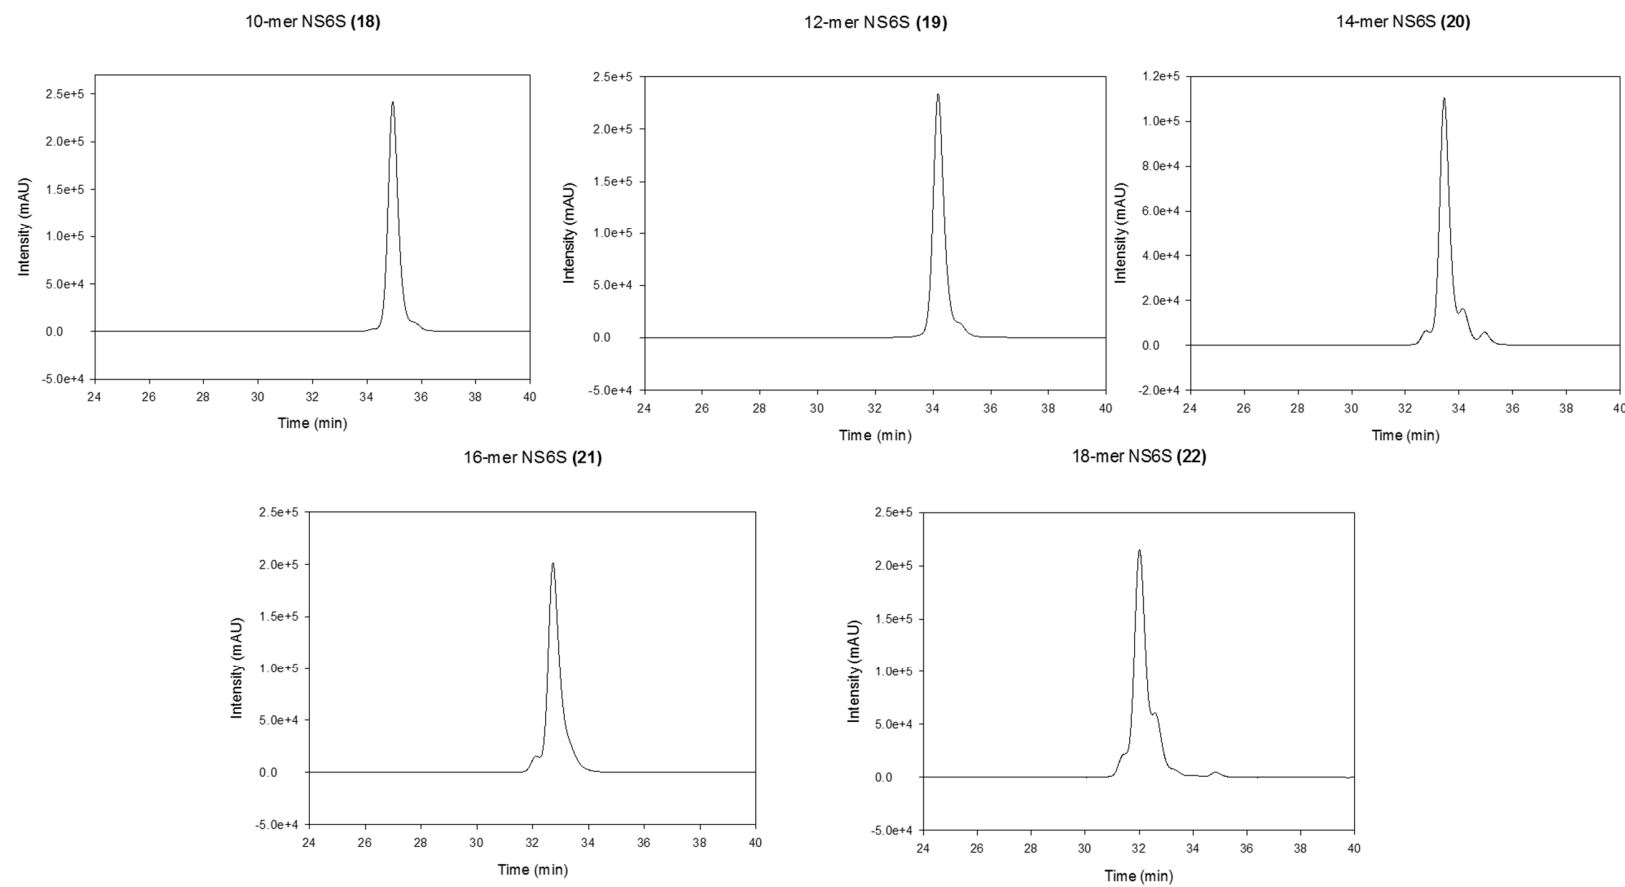

(D)

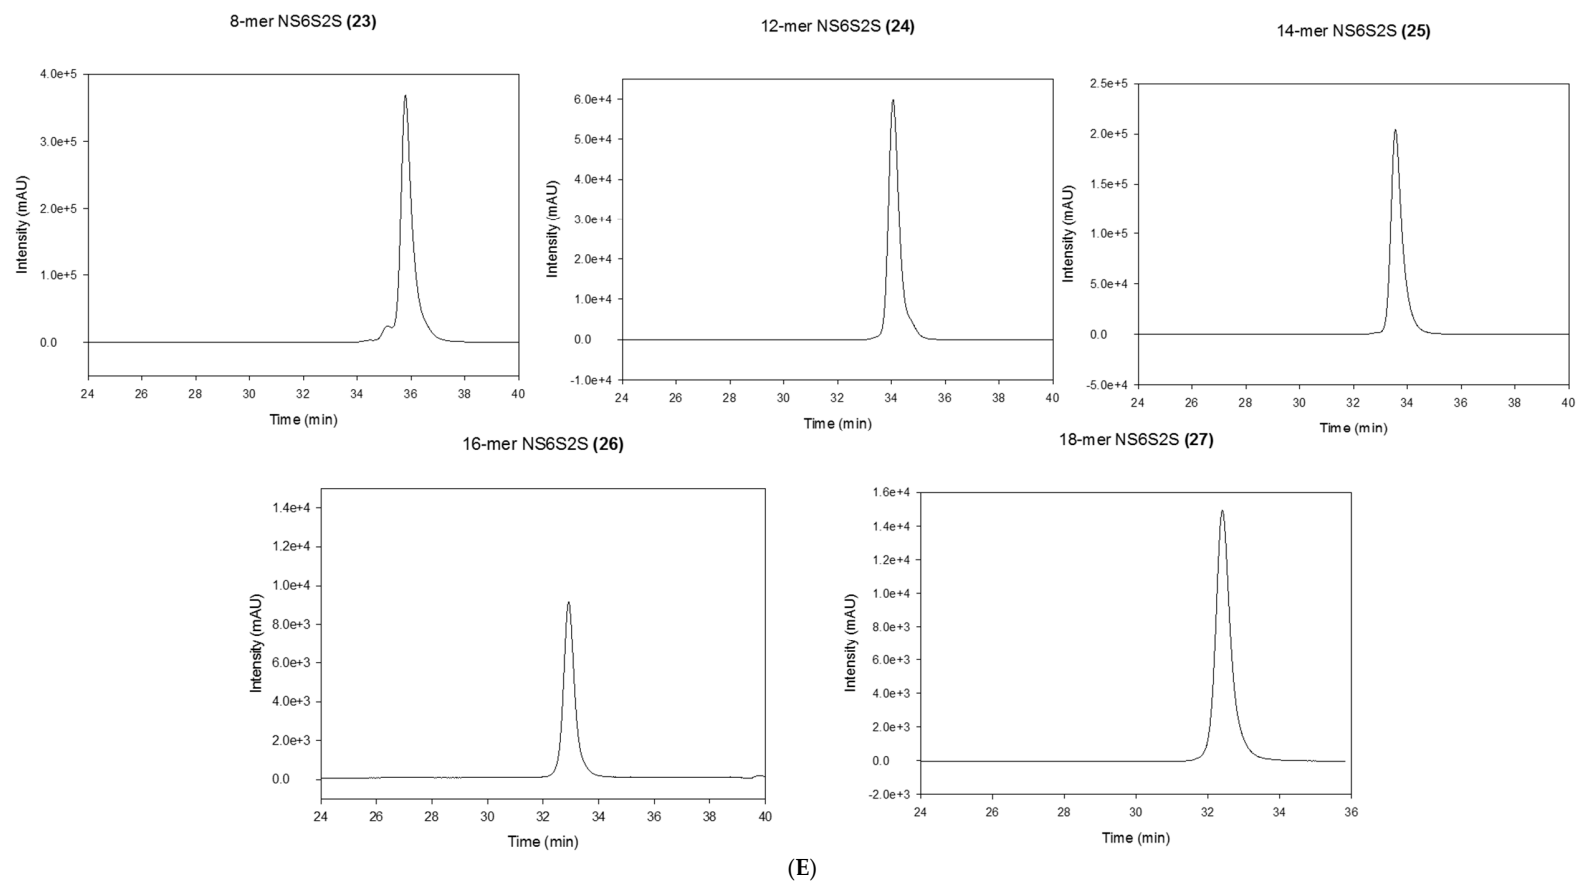

Figure S1. SEC chromatograms of synthetic oligosaccharides.

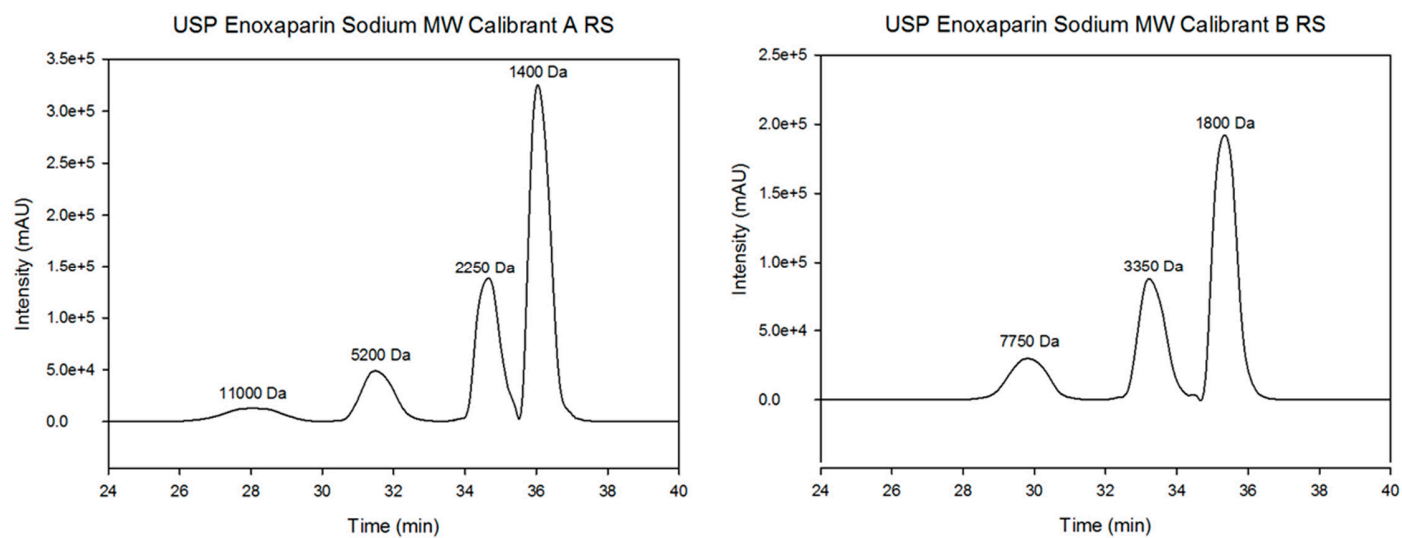

**Figure S2.** (A) USP MW Calibrant A with provided MW values indicated; (B) USP MW Calibrant B with provided MW values indicated.

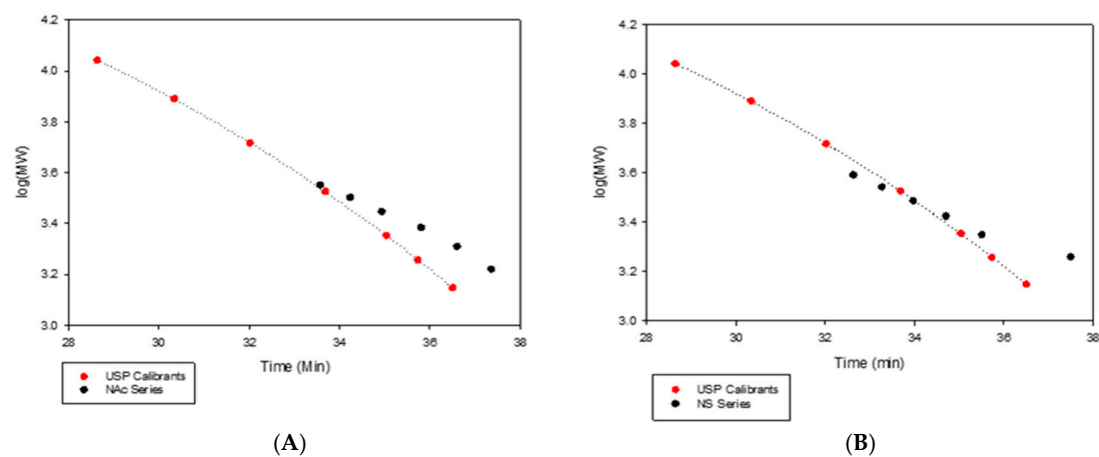

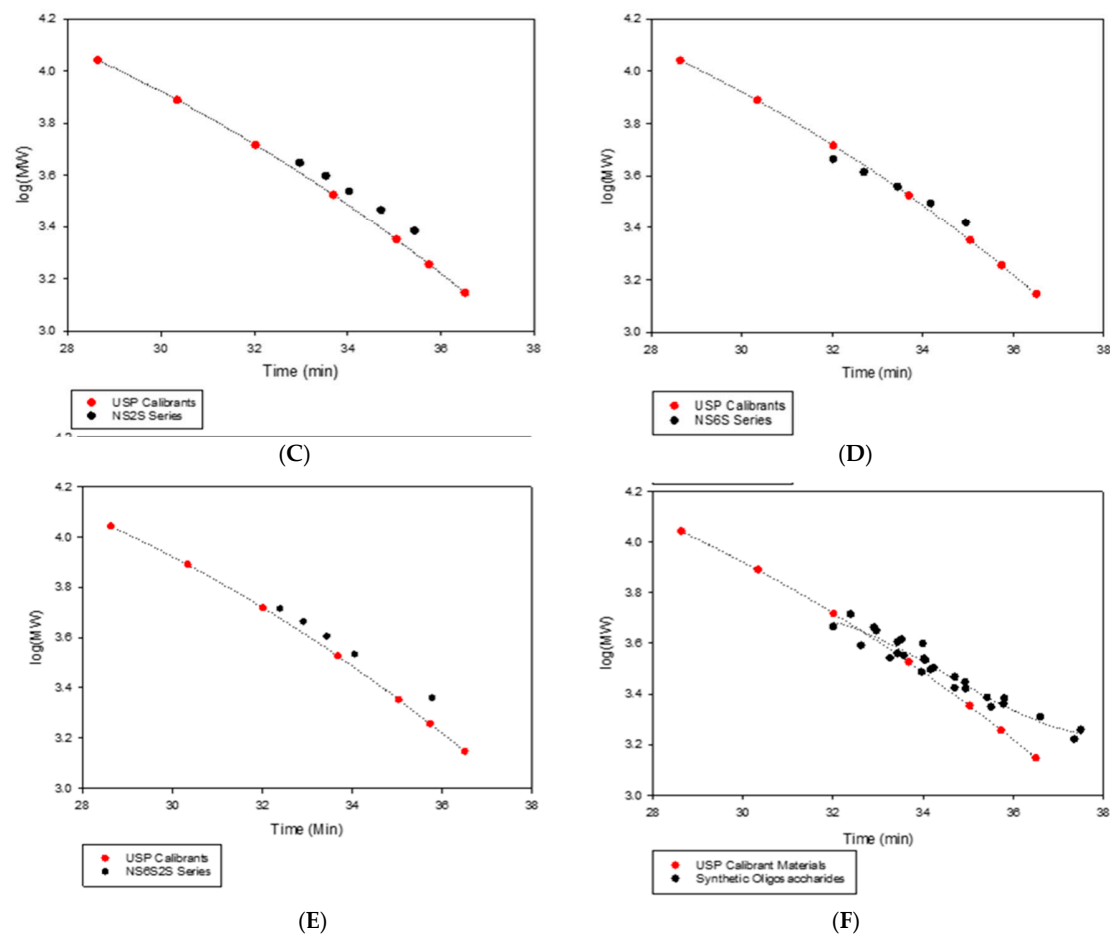

**Figure S3.** Comparison of USP Enoxaparin Calibrants (red) and structural series (black) (A) NAc series (B) NS series (C) NS2S series (D) NS6S series (E) NS6S2S series.

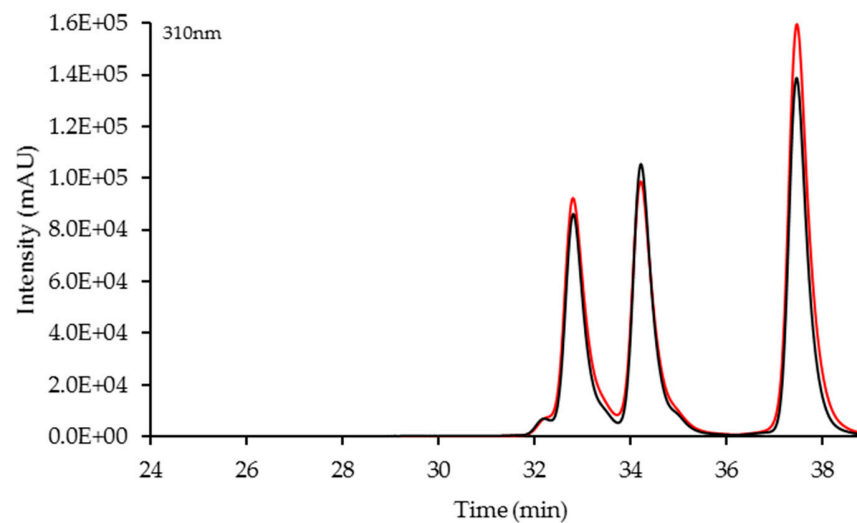

**Figure S4.** 310 nm trace from enoxaparin/oligosaccharide mixture (black) overlaid with 310 nm trace from oligosaccharide mixture alone (red). Chromatograms were obtained on different days and under the same HPLC conditions. Overlap of traces indicates that data from this system is suitable for use by the SVM model.

**Table S1.** SVM data set parameters.

| Group              | MW Range (Da) | RT Range (min) | Weight Factor |
|--------------------|---------------|----------------|---------------|
| A (NAc series)     | 2415–3553     | 33.9–35.8      | 1             |
| B (NS series)      | 2226–3895     | 32.6–35.5      | 1             |
| C (NS2S series)    | 2466–4456     | 32.9–35.4      | 2             |
| D (NS6S series)    | 2626–4616     | 32.0–34.9      | 4             |
| E (NS6S2S series)  | 2289–5176     | 32.4–35.8      | 10            |
| F (Dp4 & Dp6)      | 1200–1800     | 35.9–36.9      | 10            |
| G (USP calibrants) | 1400–11000    | 28.6–36.5      | 1             |



**Table S2.** MW determination of largest components in USP Enoxaparin RS.

| Peak Number | RT (min) | Area % | MW Predicted Using USP Calibrants (Da) | MW Predicted Using SVM Model (Da) | Deviation of Average from USP Calibrants |
|-------------|----------|--------|----------------------------------------|-----------------------------------|------------------------------------------|
| 1           | 26.8     | 0.038  | 16350 ± 1550                           | 13550 ± 650                       | 17% *                                    |
| 2           | 27.4     | 0.133  | 14850 ± 1400                           | 12850 ± 700                       | 13% *                                    |
| 3           | 27.9     | 0.271  | 13450 ± 1250                           | 12050 ± 700                       | 10% *                                    |
| 4           | 28.5     | 0.482  | 12050 ± 1050                           | 11200 ± 700                       | 6%                                       |
| 5           | 29.1     | 0.754  | 10800 ± 900                            | 10300 ± 650                       | 5%                                       |
| 6           | 29.6     | 1.130  | 9600 ± 750                             | 9400 ± 550                        | 2%                                       |
| 7           | 30.2     | 1.666  | 8500 ± 600                             | 8500 ± 550                        | 0%                                       |

\* A deviation is seen with the largest peaks in Enoxaparin RS. Such difference is likely because different mathematical models were employed for the analysis.
